# Supplementary material for: RNA-seq analysis of antibacterial mechanism of Cinnamomum camphora essential oil against Escherichia coli
Source: PeerJ. 2021 Mar 17;9:e11081. doi: 10.7717/peerj.11081 (PMC7980702; doi:10.7717/peerj.11081)
Supplement: Supplemental Information 16 [file peerj-09-11081-s016.xlsx]

## Sheet: Sheet1
control	1/8MIC	1/4MIC	1/2MIC
0.923323	309.637	1036.05	1786.71
1.03671	283.086	829.468	1548.4
1.0447	268.59	877.959	1550.74
