# Supplementary material for: RNA-seq analysis of antibacterial mechanism of Cinnamomum camphora essential oil against Escherichia coli
Source: PeerJ. 2021 Mar 17;9:e11081. doi: 10.7717/peerj.11081 (PMC7980702; doi:10.7717/peerj.11081)
Supplement: Supplemental Information 18 [file peerj-09-11081-s018.xlsx]

## Sheet: Sheet1
control	1/8MIC	1/4MIC	1/2MIC
0.995379	3.43122	3.65702	1.60034
1.06912	3.28531	3.32168	1.37982
0.939692	3.76758	3.70996	1.63699
