# Supplementary material for: RNA-seq analysis of antibacterial mechanism of Cinnamomum camphora essential oil against Escherichia coli
Source: PeerJ. 2021 Mar 17;9:e11081. doi: 10.7717/peerj.11081 (PMC7980702; doi:10.7717/peerj.11081)
Supplement: Supplemental Information 19 [file peerj-09-11081-s019.xlsx]

## Sheet: Sheet1
control	1/8MIC	1/4MIC	1/2MIC
0.968283	0.068064	0.091502	0.080769
1.00607	0.064383	0.098781	0.084981
1.02652	0.057555	0.087983	0.085753
