# Supplementary material for: RNA-seq analysis of antibacterial mechanism of Cinnamomum camphora essential oil against Escherichia coli
Source: PeerJ. 2021 Mar 17;9:e11081. doi: 10.7717/peerj.11081 (PMC7980702; doi:10.7717/peerj.11081)
Supplement: Supplemental Information 20 [file peerj-09-11081-s020.xlsx]

## Sheet: Sheet1
control	1/8MIC	1/4MIC	1/2MIC
1.01147	0.168811	0.314748	0.199764
0.992725	0.168453	0.266785	0.204001
0.995902	0.154907	0.30998	0.239476
