# Supplementary material for: RNA-seq analysis of antibacterial mechanism of Cinnamomum camphora essential oil against Escherichia coli
Source: PeerJ. 2021 Mar 17;9:e11081. doi: 10.7717/peerj.11081 (PMC7980702; doi:10.7717/peerj.11081)
Supplement: Supplemental Information 22 [file peerj-09-11081-s022.xlsx]

## Sheet: Sheet1
control	1/8MIC	1/4MIC	1/2MIC
0.971238	3.91489	4.08858	21.4834
1.12819	3.74638	3.1006	16.9521
0.912627	3.51689	4.29381	21.8989
