# Supplementary material for: RNA-seq analysis of antibacterial mechanism of Cinnamomum camphora essential oil against Escherichia coli
Source: PeerJ. 2021 Mar 17;9:e11081. doi: 10.7717/peerj.11081 (PMC7980702; doi:10.7717/peerj.11081)
Supplement: Supplemental Information 23 [file peerj-09-11081-s023.xlsx]

## Sheet: Sheet1
control	1/8MIC	1/4MIC	1/2MIC
1.06444	0.018825	0.015645	0.028473
1.10393	0.01831	0.012173	0.030675
0.851017	0.026831	0.020387	0.039492
