# Supplementary material for: RNA-seq analysis of antibacterial mechanism of Cinnamomum camphora essential oil against Escherichia coli
Source: PeerJ. 2021 Mar 17;9:e11081. doi: 10.7717/peerj.11081 (PMC7980702; doi:10.7717/peerj.11081)
Supplement: Supplemental Information 24 [file peerj-09-11081-s024.xlsx]

## Sheet: Sheet1
control	1/8MIC	1/4MIC	1/2MIC
0.959736	0.030004	0.147383	0.134927
1.0213	0.028224	0.246969	0.134131
1.02022	0.031242	0.173755	0.138986
