# Supplementary material for: RNA-seq analysis of antibacterial mechanism of Cinnamomum camphora essential oil against Escherichia coli
Source: PeerJ. 2021 Mar 17;9:e11081. doi: 10.7717/peerj.11081 (PMC7980702; doi:10.7717/peerj.11081)
Supplement: Supplemental Information 25 [file peerj-09-11081-s025.xlsx]

## Sheet: Sheet1
control	1/8MIC	1/4MIC	1/2MIC
0.96893	11.9579	16.5055	12.6393
1.00684	11.7497	16.3402	12.0552
1.02506	11.476	15.9932	12.2252
