# Supplementary material for: RNA-seq analysis of antibacterial mechanism of Cinnamomum camphora essential oil against Escherichia coli
Source: PeerJ. 2021 Mar 17;9:e11081. doi: 10.7717/peerj.11081 (PMC7980702; doi:10.7717/peerj.11081)
Supplement: Supplemental Information 27 [file peerj-09-11081-s027.xlsx]

## Sheet: Sheet1
control	1/8MIC	1/4MIC	1/2MIC
0.938509	0.06956	0.054222	0.130193
1.03043	0.062842	0.05047	0.113008
1.03406	0.061853	0.050594	0.124798
