# Supplementary material for: RNA-seq analysis of antibacterial mechanism of Cinnamomum camphora essential oil against Escherichia coli
Source: PeerJ. 2021 Mar 17;9:e11081. doi: 10.7717/peerj.11081 (PMC7980702; doi:10.7717/peerj.11081)
Supplement: Supplemental Information 29 [file peerj-09-11081-s029.xlsx]

## Sheet: Sheet1
control	1/8MIC	1/4MIC	1/2MIC
0.97911	0.297982	0.447532	0.268373
1.01525	0.392889	0.256364	0.134211
1.00599	0.545614	0.261694	0.166403
