# Supplementary material for: RNA-seq analysis of antibacterial mechanism of Cinnamomum camphora essential oil against Escherichia coli
Source: PeerJ. 2021 Mar 17;9:e11081. doi: 10.7717/peerj.11081 (PMC7980702; doi:10.7717/peerj.11081)
Supplement: Supplemental Information 30 [file peerj-09-11081-s030.xlsx]

## Sheet: Sheet1
control	1/8MIC	1/4MIC	1/2MIC
0.939749	0.492071	0.307621	0.977398
1.07032	0.44091	0.264721	0.875541
0.994198	0.461737	0.285026	0.914397
