# Supplementary material for: RNA-seq analysis of antibacterial mechanism of Cinnamomum camphora essential oil against Escherichia coli
Source: PeerJ. 2021 Mar 17;9:e11081. doi: 10.7717/peerj.11081 (PMC7980702; doi:10.7717/peerj.11081)
Supplement: Supplemental Information 31 [file peerj-09-11081-s031.xlsx]

## Sheet: Sheet1
control	1/8MIC	1/4MIC	1/2MIC
1.18512	0.234839	0.219859	0.203309
0.962734	0.251664	0.270645	0.217875
0.876456	0.239349	0.308047	0.294641
