# Supplementary material for: RNA-seq analysis of antibacterial mechanism of Cinnamomum camphora essential oil against Escherichia coli
Source: PeerJ. 2021 Mar 17;9:e11081. doi: 10.7717/peerj.11081 (PMC7980702; doi:10.7717/peerj.11081)
Supplement: Supplemental Information 32 [file peerj-09-11081-s032.xlsx]

## Sheet: Sheet1
control	1/8MIC	1/4MIC	1/2MIC
1.04024	0.217896	0.156386	0.413623
0.942358	0.231548	0.171266	0.324819
1.02012	0.23445	0.178623	0.44074
